# Supplementary material for: Stimuli-Responsive Polypeptide Nanoparticles for Enhanced DNA Delivery
Source: MDPI journal article supplement (doi:10.3390/molecules27238495), 2022-12-02
Supplement: s1 [file s1]

Supplementary Materials

# Stimuli-Responsive Polypeptide Nanoparticles for Enhanced DNA delivery

Olga Korovkina <sup>1</sup>, Dmitry Polyakov <sup>2</sup>, Viktor Korzhikov-Vlakh <sup>1,3</sup> and Evgenia Korzhikova-Vlakh <sup>3\*</sup>

<sup>1</sup> Saint-Petersburg State University, Institute of Chemistry, Universitetsky pr. 26, 198504 St. Petersburg, Russia

<sup>2</sup> Institute of Experimental Medicine, Acad. Pavlov Street 12, 197376 St. Petersburg, Russia

<sup>3</sup> Institute of Macromolecular Compounds, Russian Academy of Sciences, Bolshoy pr. 31, 199004, St. Petersburg, Russia

\* Correspondence: vlakh@hq.macro.ru (E.K.-V.)

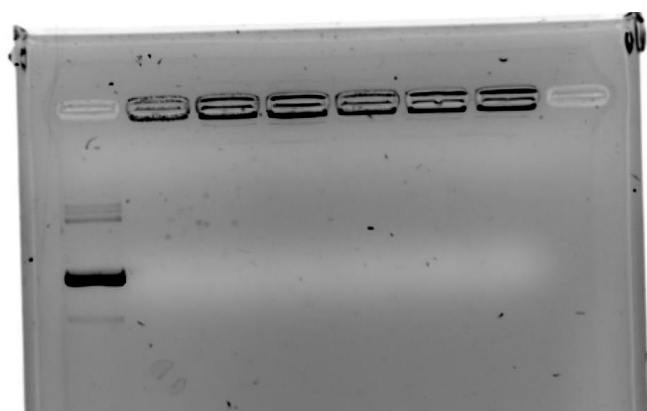

(a)

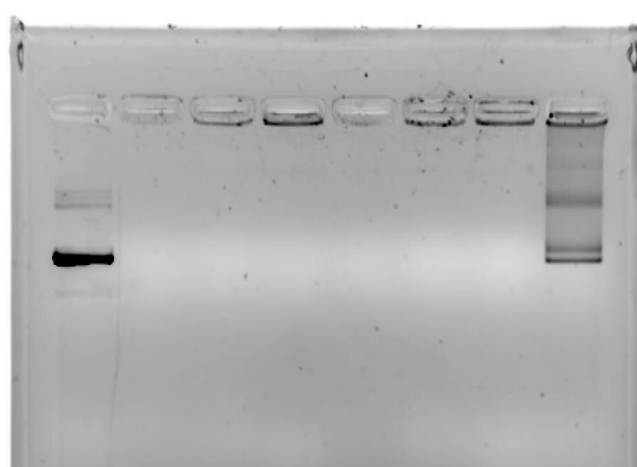

(b)

**Figure S1.** The initial gel-electrophoresis images to the marked ones shown in Figure 6 of the main text: (a) and (b) correspond to (a) and (b) of Figure 6. The description is provided in the Figure 6 and its legend, as well as in the text of section 2.4.

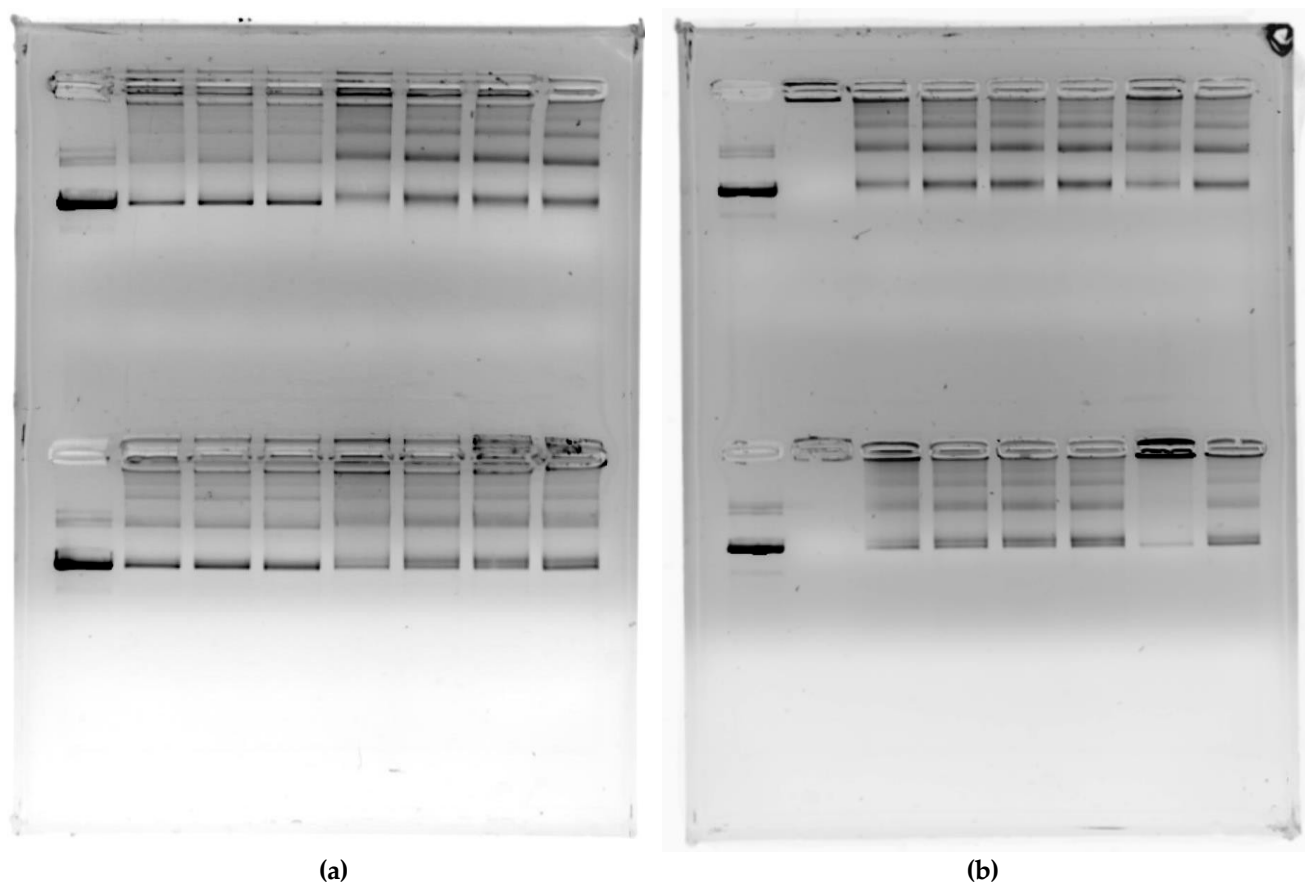

**Figure S2.** The initial gel-electrophoresis images to the marked ones shown in Figure 8 of the main text: top and bottom images **(a)** correspond to (a) and (b) images of Figure 8, respectively; top and bottom images **(b)** correspond to (c) and (d) images of Figure 8, respectively. The description is provided in the Figure 8 and its legend, as well as in the text of section 2.5.
